# Supplementary material
Source: PubMed Central journal article supplement (PMC8319948)

# Supplementary Figure 1: Schema Depicting Designation of Study Patients

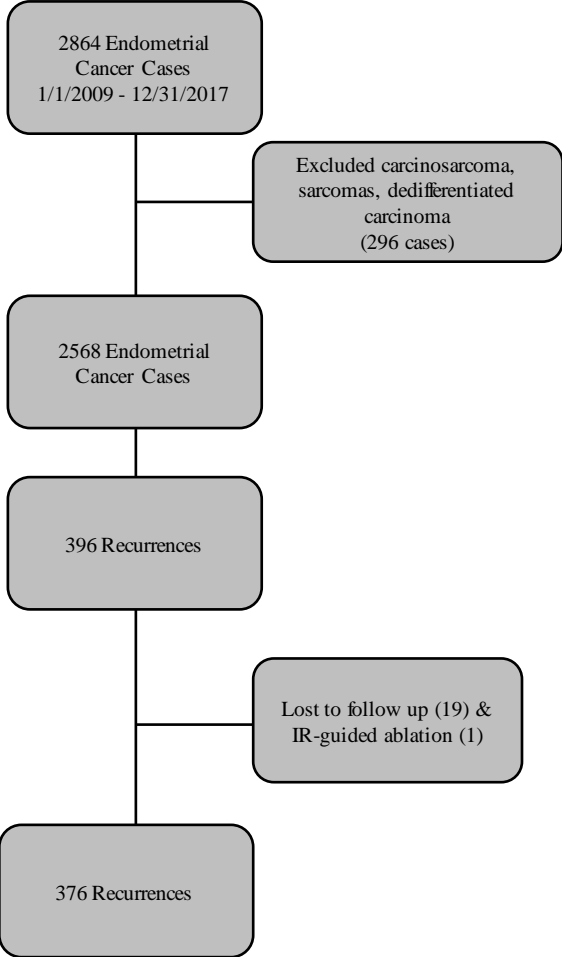

Supplement: NIHMS1708239-supplement-1.pdf [file NIHMS1708239-supplement-1.pdf]
